# Supplementary material for: Reduction of Midline Shift Following Decompressive Hemicraniectomy for Malignant Middle Cerebral Artery Infarction
Source: PubMed Central journal article supplement — J Stroke. 2016 Sep 30;18(3):328–36. doi: 10.5853/jos.2016.00262 (PMC5066438; doi:10.5853/jos.2016.00262), 2016-09-30
Supplement: jos-2016-00262-supple1.pdf [file jos-2016-00262-supple1.pdf]

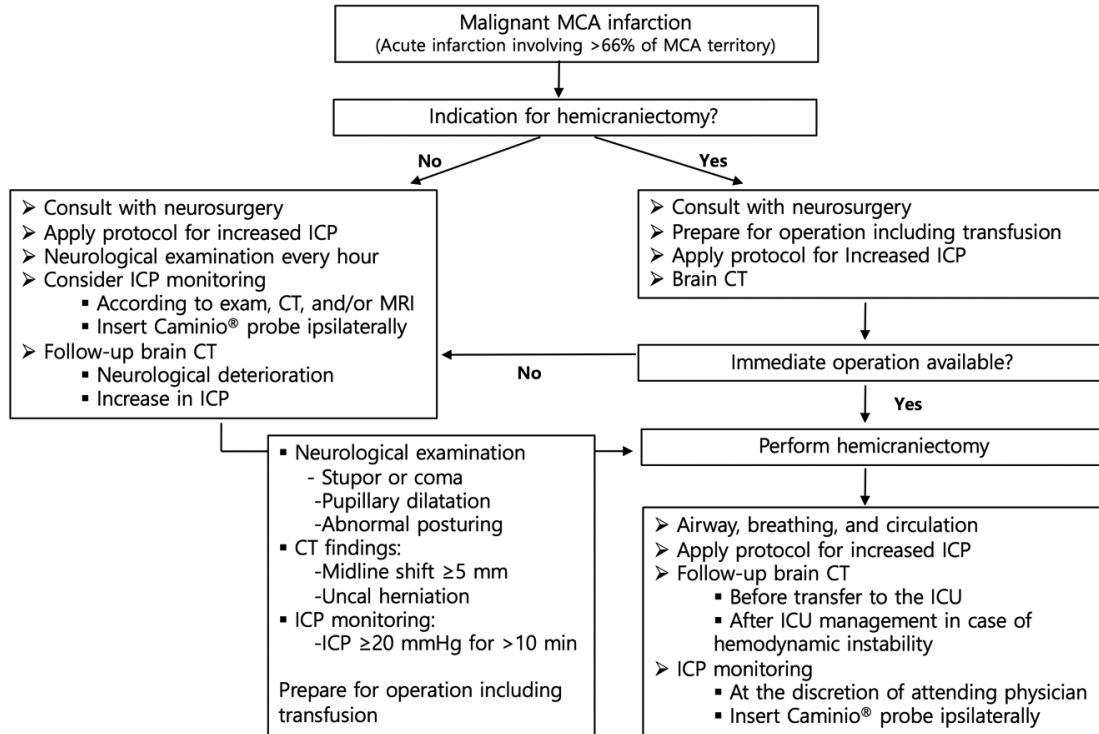

**Supplementary Figure 1.** Management algorithm for malignant middle cerebral artery infarction. MCA indicates middle cerebral artery; ICP, intracranial pressure; ICU, intensive care unit; CT, computed tomography.
