# Supplementary material for: Reduction of Midline Shift Following Decompressive Hemicraniectomy for Malignant Middle Cerebral Artery Infarction
Source: PubMed Central journal article supplement — J Stroke. 2016 Sep 30;18(3):328–36. doi: 10.5853/jos.2016.00262 (PMC5066438; doi:10.5853/jos.2016.00262), 2016-09-30
Supplement: jos-2016-00262-supple2.pdf [file jos-2016-00262-supple2.pdf]

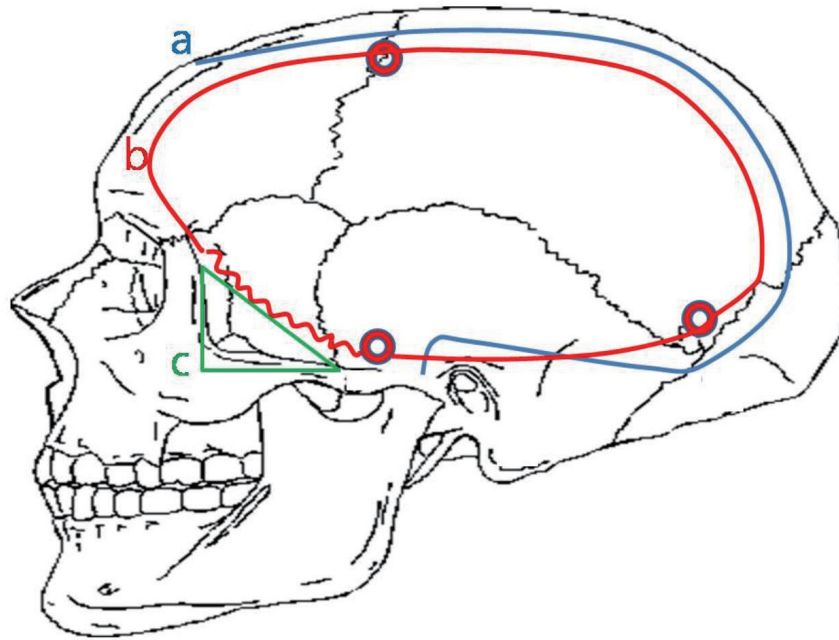

**Supplementary Figure 2.** Incision lines for the hemicraniectomy. The blue line shows a question-mark-shaped skin incision line (a). The skin, temporalis muscle, fascia, and periosteum are retracted after the incision. The red line indicates the margin for skull incision (b). Three red circles demonstrate points for major burr holes. A large bony window was created by removing a bone flap in the frontal, parietal, temporal, and occipital regions. The green line is for the additional resection of parts of the temporal bone (c). The dura was opened and fixed at the margin of the craniotomy to prevent epidural bleeding. An expansive duroplasty was then carried out using an artificial dura mater. Resection of the temporalis muscle and the infarcted brain tissue was not routinely performed.
