# Supplementary material for: Reduction of Midline Shift Following Decompressive Hemicraniectomy for Malignant Middle Cerebral Artery Infarction
Source: PubMed Central journal article supplement — J Stroke. 2016 Sep 30;18(3):328–36. doi: 10.5853/jos.2016.00262 (PMC5066438; doi:10.5853/jos.2016.00262), 2016-09-30
Supplement: jos-2016-00262-supple3.pdf [file jos-2016-00262-supple3.pdf]

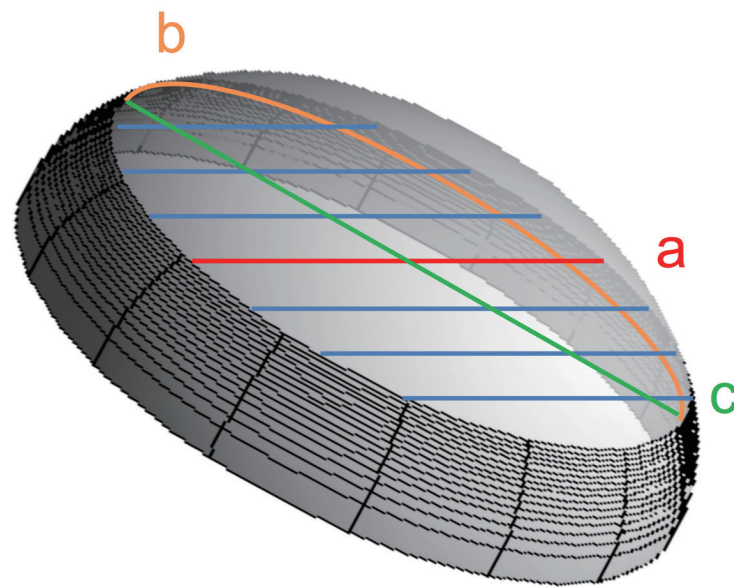

**Supplementary Figure 3.** Maximal length of the bone flap. The size of bone flap was determined using the longest distance between opposing hemicraniectomy edges on axial cuts of postoperative CT for a bone flap with an oval shape. Blue parallel lines indicate lines connecting two opposing edges on serial axial cuts of post-hemicraniectomy CT, and the largest blue lines is marked in red. We used a red line (a) to indicate a bone flap size that is typically shorter than that measured intraoperatively (b) or on a skull radiograph (c).
