# Supplementary material for: Reduction of Midline Shift Following Decompressive Hemicraniectomy for Malignant Middle Cerebral Artery Infarction
Source: PubMed Central journal article supplement — J Stroke. 2016 Sep 30;18(3):328–36. doi: 10.5853/jos.2016.00262 (PMC5066438; doi:10.5853/jos.2016.00262), 2016-09-30
Supplement: jos-2016-00262-supple4.pdf [file jos-2016-00262-supple4.pdf]

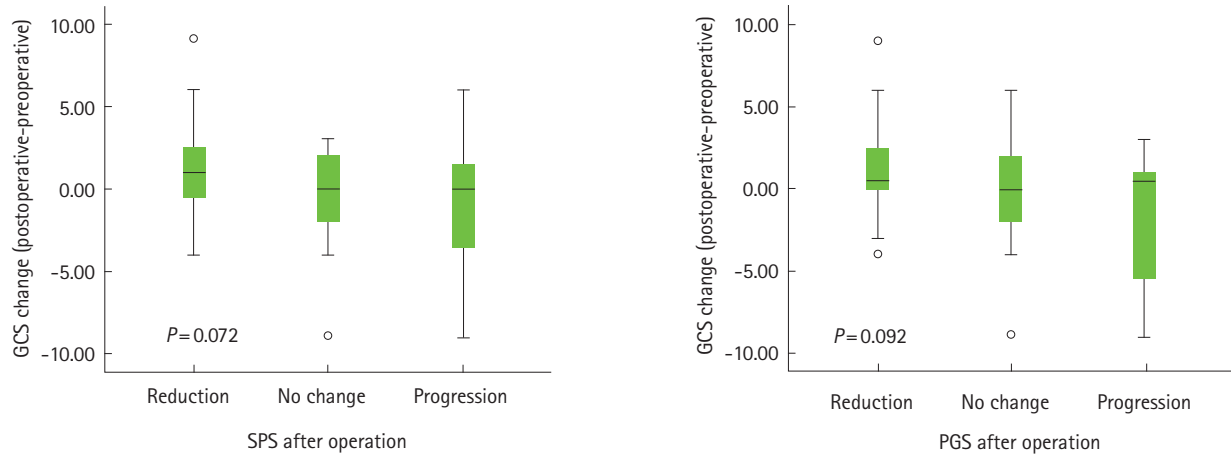

**Supplementary Figure 4.** Reduction in midline shift and improvement of consciousness after hemispheric resection. GCS, Glasgow Coma Scale; SPS, midline shift (septum pellucidum shift); PGS, midline shift (pineal gland shift).
