# Supplementary material for: Reduction of Midline Shift Following Decompressive Hemicraniectomy for Malignant Middle Cerebral Artery Infarction
Source: PubMed Central journal article supplement — J Stroke. 2016 Sep 30;18(3):328–36. doi: 10.5853/jos.2016.00262 (PMC5066438; doi:10.5853/jos.2016.00262), 2016-09-30
Supplement: jos-2016-00262-supple5.pdf [file jos-2016-00262-supple5.pdf]

**Supplementary Table 1.** Factors associated with mortality at six months using multiple logistic regression analyses

|                          | Mortality at 180 days post-stroke |          |
|--------------------------|-----------------------------------|----------|
|                          | Adjusted odds ratio (95% CI)      | <i>P</i> |
| <b>Model 1</b>           |                                   |          |
| Sex (male)               | 0.25 (0.06–1.00)                  | 0.050    |
| NIHSS score on admission | 1.22 (1.04–1.43)                  | 0.013    |
| Preoperative SPS (mm)    | 1.26 (1.04–1.53)                  | 0.019    |
| Reduction in SPS (mm)    | 0.52 (0.37–0.73)                  | < 0.001  |
| <b>Model 2</b>           |                                   |          |
| Sex (male)               | 0.30 (0.09–0.99)                  | 0.048    |
| NIHSS score on admission | 1.16 (1.02–1.31)                  | 0.027    |
| Preoperative PGS (mm)    | 1.18 (0.94–1.47)                  | 0.156    |
| Reduction in PGS (mm)    | 0.57 (0.94–1.47)                  | 0.002    |
| <b>Model 3</b>           |                                   |          |
| Age                      | 1.03 (0.95–1.11)                  | 0.509    |
| Sex (male)               | 0.31 (0.07–1.46)                  | 0.138    |
| NIHSS score on admission | 1.22 (1.04–1.42)                  | 0.014    |
| Preoperative SPS (mm)    | 1.27 (1.04–1.54)                  | 0.018    |
| Reduction in SPS (mm)    | 0.51 (0.35–0.72)                  | < 0.001  |
| <b>Model 4</b>           |                                   |          |
| Age                      | 1.01 (0.96–1.07)                  | 0.645    |
| Sex (male)               | 0.34 (0.09–1.25)                  | 0.103    |
| NIHSS score on admission | 1.15 (1.02–1.31)                  | 0.028    |
| Preoperative PGS (mm)    | 1.19 (0.95–1.49)                  | 0.141    |
| Reduction in PGS (mm)    | 0.56 (0.39–0.81)                  | 0.002    |

CI, confidence interval; NIHSS, National Institutes of Health Stroke Scale; SPS, midline shift (septum pellucidum shift); PGS, midline shift (pineal gland shift).
